# Supplementary material
Source: PubMed Central journal article supplement (PMC5042854)
Supplement: NIHMS807275-supplement-3.pdf [file NIHMS807275-supplement-3.pdf]

**Table 2b. Classification of protein biomarkers from urinary exosomes based on radiation exposure and time post-exposure. X marks the detection of the protein in the Vesiclepedia database.**

| Accession#          | Symbol | 24hr | 72hr | Exosomes |       |        |             |     | Additional        |
|---------------------|--------|------|------|----------|-------|--------|-------------|-----|-------------------|
|                     |        |      |      | Plasma   | Urine | Cancer | Immune cell | MSC |                   |
| <b>Group 1 (2)</b>  |        |      |      |          |       |        |             |     |                   |
| Q91WP6              | SPA3N  |      |      | x        |       |        |             |     |                   |
| P41317              | MBL2   |      |      | x        |       | x      |             |     | Saliva            |
| <b>Group 2 (2)</b>  |        |      |      |          |       |        |             |     |                   |
| P05366              | SAA1   |      |      | x        | x     | x      | x           |     |                   |
| P12246              | SAMP   |      |      |          |       | x      |             |     | Saliva            |
| <b>Group 3 (3)</b>  |        |      |      |          |       |        |             |     |                   |
| P05367              | SAA2   |      |      | x        | x     | x      |             |     | Saliva            |
| P09813              | APOA2  |      |      |          |       |        |             |     |                   |
| O88947              | FA10   |      |      |          |       |        |             |     |                   |
| <b>Group 4 (4)</b>  |        |      |      |          |       |        |             |     |                   |
| Q9DBD0              | ICA    |      |      |          |       | x      |             |     |                   |
| Q9ESB3              | HRG    |      |      | x        | x     | x      |             |     |                   |
| P13020              | GSN    |      |      |          |       |        | x           |     | Oligodendrocytes  |
| Q9JJN5              | CPN1   |      |      |          |       |        |             |     | Reticulocytes     |
| <b>Group 5 (13)</b> |        |      |      |          |       |        |             |     |                   |
| Q9Z126              | PF4    |      |      | x        |       |        | x           |     |                   |
| Q8BH35              | C8B    |      |      | x        |       |        |             |     |                   |
| Q61703              | ITIH2  |      |      | x        | x     | x      | x           | x   | Endothelial cells |
| Q61702              | ITIH1  |      |      | x        | x     | x      | x           |     |                   |
| P70389              | IGFALS |      |      | x        | x     | x      |             | x   |                   |
| Q8K182              | C8A    |      |      | x        | x     |        |             |     |                   |
| P26262              | KLKB1  |      |      | x        | x     |        | x           |     |                   |
| Q01279              | EGFR   |      |      | x        | x     | x      |             | x   | Saliva            |
| Q08761              | PROS1  |      |      | x        | x     |        | x           |     |                   |
| P06683              | C9     |      |      | x        | x     | x      | x           |     | Endothelial cells |
| Q9Z2U1              | PSMA5  |      |      | x        | x     | x      | x           | x   | Endothelial cells |
| Q8VCG4              | C8G    |      |      | x        | x     | x      |             |     |                   |
| Q921I1              | TF     |      |      | x        | x     | x      | x           | x   |                   |
